# Supplementary material
Source: HighWire-hosted journal article supplement (http://cmajopen.ca/highwire/filestream/80880/field_highwire_adjunct_files/0/open-2016-0029-original-submission.pdf)
Supplement: open-2016-0029-original-submission.pdf [file open-2016-0029-original-submission.pdf]

1  
2  
3 **TITLE:** Comparing cervical cancer stage of diagnosis at presentation in immigrant women and  
4 long-term residents: a retrospective cohort study  
5  
6

7 Authors:

8 R. T. Voruganti<sup>1</sup>, R. Moineddin<sup>1,2,3,4</sup>, N. Jembere<sup>3</sup>, L. Elit<sup>5</sup>, E. Grunfeld<sup>1,2,3,4,6</sup> and A. K.  
9 Lofters<sup>2,3,4,7</sup>  
10

11 <sup>1</sup>Institute of Health Policy, Management and Evaluation, University of Toronto

12 <sup>2</sup>Department of Family and Community Medicine, University of Toronto

13 <sup>3</sup>Institute of Clinical Evaluative Sciences

14 <sup>4</sup>Dalla Lana School of Public Health, University of Toronto

15 <sup>5</sup>Department of Obstetrics and Gynecology, McMaster University

16 <sup>6</sup>Ontario Institute for Cancer Research

17 <sup>7</sup>Centre for Research on Inner City Health, Li Ka Shing Knowledge Institute, St. Michaels  
18 Hospital, Toronto, ON  
19  
20  
21

22  
23 Key Words:

24 Emigrants and immigrants

25 Retrospective studies

26 Administrative data

27 Cervical neoplasms

28 Vulnerable populations

29 Statistics and numerical data  
30  
31  
32  
33  
34  
35  
36  
37  
38  
39  
40  
41  
42  
43  
44  
45  
46  
47  
48  
49  
50  
51  
52  
53  
54  
55  
56  
57  
58  
59  
60

**ABSTRACT**

Background: Globally, cervical cancer is the fourth most common cancer in women and seventh most common cancer overall. Cervical cancer is highly preventable with screening. Previous work has shown that immigrants are less likely to be screened than non-immigrants in Ontario, Canada. We examined whether immigrant women are more likely to present with later stage cervical cancer than long-term residents of the province.

Methods: We conducted a retrospective matched cohort study of women with cervical cancer diagnosed from 2010 to 2014 using provincial administrative health data, comparing the odds of late stage diagnosis between immigrants and long-term residents, adjusting for socioeconomic measures, comorbidities and healthcare utilization. The outcome of interest was stage of cervical cancer diagnosis, defined as early (stage I) or late (stage II-IV). We confirmed results with a cohort from 2007-2012.

Results: Complete staging data was available for 218 immigrants and 1348 non-immigrants. We found no association between immigrant status and stage at diagnosis (adjusted OR: 0.935, p value=0.739). Factors that did show significant association with late stage diagnosis were physician characteristics, whether a woman had been previously screened, and having visited a gynecologist in the past 3 years. These results were echoed in the 2007-2012 cohort (immigrants vs. long-term residents OR: 0.942, adjusted p value=0.6773).

Interpretation: Our results show that being an immigrant is not associated with late stage diagnosis of cervical cancer in Ontario. Programs broadly aimed at immigrants may require a targeted approach to address higher-risk subgroups.

## INTRODUCTION

Globally, cervical cancer is the fourth most common cancer in women and seventh most common cancer overall, with age-standardized incidence rates (ASIR) and death rates (ASDR) nearly twice as high in developing countries as developed countries (ASIR 15.70 vs. 9.58; ASDR 8.32 vs. 3.96)(1, 2). Differences in incidence rates can be attributed to the widespread implementation of screening programs in developed countries, which make use of the Papanicolaou (Pap) test to detect the presence of pre-cancerous changes or cancer(3). If pre-invasive and early-stage disease is detected, close monitoring and treatment can prevent the progression to invasive cancer(3). In Canada, it is estimated that 1500 new cases will be diagnosed in 2015 with nearly half of incident cases occurring in Ontario(4).

In developed countries, such as Canada, where screening programs exist, it is concerning that immigrant women are less likely to be screened than non-immigrants(5, 6). Moreso, previous research has shown that diagnosis of advanced stage cervical cancer has been found to be associated with low socioeconomic status(7). While marginalized populations are known to have poorer access to healthcare resources, recent studies comparing stage at diagnosis among foreign-born vs. US-born women have yielded contrasting findings, with one study finding no difference in diagnosis of late stage cervical cancer between foreign-born women and non-immigrant women, and another finding that foreign-born women were more likely to be diagnosed with late stage cancer(8, 9). However, we have found no studies exploring this question in the Canadian setting.

Given these conflicting results and evidence that immigrants are less likely to be screened for cervical cancer in Ontario, further exploration is warranted of the relationship between immigrant status and stage at diagnosis. The aim of this study was to examine the association between cervical cancer stage at diagnosis among immigrant women compared to Ontario's long-term residents.

## METHODS

### Setting

Ontario is Canada's most populous province, with a population of 13.8 million people as of 2015(10). Census data from 2011 indicated that 28.5% of Ontarians are immigrants, and the most common regions of origin are South Asia (18.5% of immigrants) and China (12.3%)(11). In Ontario, coverage of medically necessary services is provided through a government-funded, single-payer system. Physician services are covered by the Ontario Health Insurance Program and hospital services are provided for by the Ministry of Health and Long Term Care.

### Study design and patient population

We conducted a retrospective matched cohort study using population-level administrative data that are de-identified and linked through a comprehensive research agreement between the Institute for Clinical Evaluative Sciences (ICES) and the Ontario Ministry of Health and Long Term Care. The cohort consisted of women, aged 25 years and over, residing in Ontario with cervical cancer (ICD 10-CA code C53.X) diagnosed on or after January 1, 2010 until October 2014 and who were eligible for health coverage throughout the study period.

## Outcome

The primary outcome was stage of cervical cancer stratified into late stage (stage II-IV) and early stage (I). We excluded cases of pre-cancerous carcinoma in situ and cases of recurrent cancer. Staging is captured in the Ontario Cancer Registry using best available stage through collaborative staging. Collaborative staging is a novel process for assigning stage which employs an algorithm to reconcile stage from clinical and pathological stage data acquired from patient health records in community hospitals and regional cancer centers. Collaborative stage recording practices began in 2007 and capture of cervical cancer stage with this novel staging methodology became available in 2011/2012. Data on subcategories within each stage was not available (ie Stage IIA vs. IIB).

## Data sources

For this study, several sources were accessed for data on the primary outcome, exposure, and covariates. The exposure of interest, immigrant status, was identified from the Citizenship and Immigration Canada (CIC) database which contains demographic and language information on Ontario permanent residents with a landing visa by date of issue arriving from 1985-2014. The CIC also captures place of origin (i.e. country/region of birth) and immigrant class (i.e. economic, family, refugee). Cervical cancer stage data was obtained from the Ontario Cancer Registry, a passive surveillance patient registry which links data from hospitals, cancer centers and pathology labs(12). The Ontario Health Insurance Program (OHIP) and Canadian Institute for Health Information Discharge Abstract Database (CIHI-DAD) provided information on measures of healthcare utilization and comorbidity (using the Johns Hopkins Case-Mix Aggregated Diagnosis Group (ADG) and Resource Utilization Bands (RUB)). Data on socioeconomic status defined by neighbourhood income quintile and residence type (large urban/small urban/rural), measured with the Rurality Index of Ontario (RIO) score, were derived from the Registered Persons Database (RPDB), Postal Code Conversion File (PCCF) and Statistics Canada 2006 Census data. As family physicians are typically the first point of access to the healthcare system, physician characteristics were obtained from the ICES Physicians Database (IPDB) and Corporate Physicians Database (CPDB). These were family physician sex, whether they are an international medical graduate, and whether patients are rostered with the primary care provider as part of a patient enrolment model. HIV status was obtained from the Ontario HIV database. Linkage of data sources was done using a secure encrypted ICES number (IKN) performed on premises.

This study received ethics approval from the Research Ethics Board of Sunnybrook Health Sciences Centre in Toronto, Ontario.

## Variable Definitions and Operationalization

We defined immigrants as those who were identified in the CIC, which refers to a person who had a landed immigrant/permanent resident status at any time from 1985 to 2014. Long-term residents were defined as those not identified in the CIC, i.e. women who were Canadian-born, or who arrived before 1985. In Canada, immigrants are admitted under one of three categories: economic class (skilled workers), family class (relatives of Canadian residents), refugees and other (typically accepted for compassionate reasons)(13). We looked at whether an individual had been screened before and up to one year prior to the date of diagnosis (the pre-diagnostic interval, during which screening tests are likely diagnostic in nature). We limited the cohort to women over age 25 as women under 25 years would have likely received HPV

1  
2  
3 vaccination in schools due to a relatively recent school-based vaccination program in Ontario.  
4 Healthcare utilization was measured as any visit to a healthcare provider in the 3 years prior to  
5 the pre-diagnostic interval, and also as any visit to a gynecologist in the 3 years prior to the pre-  
6 diagnostic interval. This period of time was felt to sufficiently represent active use of the  
7 healthcare system prior to diagnosis. We excluded cases with a recorded hysterectomy prior to  
8 diagnosis. ADGs, captured up to one year before the date of diagnosis, were stratified into  
9 groupings of 0, 1-5, 6-10, 10+, with higher levels indicating greater comorbidity.  
10  
11

### 12 13 **Statistical Analysis**

14 Immigrants were matched 1:4 to long-term residents +/- 5 years of age at date of  
15 diagnosis, and on census tract. Bivariate and multivariate conditional logistic regressions were  
16 used to determine odds ratios for late stage cervical cancer for immigrants vs. long-term matched  
17 residents. We report p-values for odds ratios less than 0.05 as significant. SAS 9.3 was used to  
18 conduct the analyses. All cell sizes of less than 5 women were suppressed.  
19  
20

### 21 **RESULTS**

22 Before matching, our study sample consisted of 2508 women, 345 of which (13.7%) were  
23 immigrants. In comparison, 25-26% of women aged 25 and over in Ontario are foreign-born (11,  
24 14). Figure 1 shows the process of cohort selection. Among the cohort, immigrants were  
25 matched on age at diagnosis (median age=50) and census tract with 1380 long-term residents  
26 (median age=53). Characteristics of the study cohort are presented in Table 1. Immigrant women  
27 with cervical cancer were more likely to live in a lower-income neighbourhood and to live in a  
28 major urban area. Nearly all immigrants had a family physician while 4.6% of long-term  
29 residents did not. Compared with 18.1% of long-term residents, 44.6% of immigrants had a  
30 family physician who was a graduate of a non-Canadian/American medical school.  
31  
32

33 Table 2a and 2b describe the characteristics of the 345 immigrant women in the study  
34 cohort. More than 40% spoke neither English nor French, Canada's two official languages.  
35 13.9% of immigrants were refugees, 39% were economic class immigrants and 47.1% were  
36 family class immigrants. In our sample, the majority of immigrants with diagnosis of cervical  
37 cancer immigrated from East Asia (34.2%), Western Europe and USA (27.2%), and South Asia  
38 (13.9%). Table 2b presents immigrant characteristics by stage at diagnosis. Women of East  
39 Asian or Western European/American origin had a higher incidence of early stage cancer, while  
40 South Asian women had a higher incidence of late stage cancer.  
41  
42

43 Participant demographics stratified by early vs. late stage are present in Table 3.  
44 Regarding stage at diagnosis, 34.2% of immigrants were diagnosed with stage I, 12.4% with  
45 stage II, 9.8% with stage III and 6.7% with stage IV cervical cancer. Stage data was not available  
46 for 36.8% of immigrants. Among long-term residents 33.5% were diagnosed with stage I, 10.2%  
47 with stage II, 11.8% with stage III and 7.7% with stage IV disease. There was no stage data  
48 available for 36.7% of long-term residents. A confirmatory analysis was performed with data  
49 using a sample cohort from 2007-2012 where the availability of stage data was greater; stage  
50 data was not available for 13.5% of immigrants and 14.4% of long-term residents (results not  
51 shown). Between cohorts, results were comparable.  
52

53 We did not observe a difference in screening history between immigrants and long-term  
54 residents: 33.3% of immigrants and 32.2% of long-term residents were screened within the three  
55 years before the pre-diagnostic interval, and 51.8% of immigrants and 51.1% long-term residents  
56 had never been screened. We also did not see an income gradient, difference in comorbidity or  
57  
58  
59  
60

1  
2  
3 residence type between immigrants or long-term residents diagnosed with cervical cancer. In the  
4 recent cohort, among both groups, 51% of women had no record of screening in available data.

5  
6 The unadjusted and adjusted odds ratios for the outcome of late vs. early stage cervical  
7 cancer at the time of diagnosis are presented in Table 4. No significant difference in diagnosis of  
8 late stage cancer was observed between immigrants and long-term residents (unadjusted OR:  
9 0.99  $p=0.9529$ ; adjusted OR: 0.935  $p=0.739$ ). In bivariate analyses, significant associations were  
10 seen with comorbidity, screening status, gynecologist visit, sex of family physician and number  
11 of healthcare contacts in past 3 years, but only history of visit to a gynecologist in the pre-  
12 diagnostic interval remained significant in the adjusted model. HIV was excluded as a variable  
13 from the model as there were too few cases and screening status was excluded as lack of  
14 screening could be on the causal pathway.  
15  
16

## 17 INTERPRETATION

18 Using population-level administrative data, the results from our study show no  
19 association between immigrant status and stage of diagnosis of cervical cancer among women  
20 diagnosed with cervical cancer in Ontario from 2010 to 2014. These results were replicated with  
21 data from a 2007-2012 cohort, to confirm that the observed lack of association was not due to  
22 data unavailability.  
23

24 The findings in this study present a thought-provoking query as to why, despite being  
25 screened for cervical cancer less than long-term residents(15), immigrant women in Ontario do  
26 not present with more advanced disease. Risk factors for cervical cancer include HPV infection  
27 (which is sexually transmitted) and smoking, and it is reasonable to suggest that Ontario's  
28 immigrant population may have a lower prevalence of these risk factors. We observed variations  
29 in stage at diagnosis by region of origin, including a higher incidence of later stage cancer in  
30 South Asian women. This may reflect findings from previous research where South Asian  
31 women showed the lowest rates of screening among immigrant women in Ontario(5). This could  
32 indicate causes related to sociocultural determinants of health associated with place of origin,  
33 including religious and cultural beliefs influencing how and when healthcare is accessed(16-18),  
34 however, numbers were too small to draw any firm conclusions. One possible interpretation of  
35 these results may be the healthy immigrant effect: that those who are able to immigrate are  
36 selected for and have better health immediately after migration than long-term residents(8, 19).  
37

38 Our finding that physician characteristics were related to stage at diagnosis may be due to  
39 the notion that female patients feel more comfortable with female healthcare providers,  
40 especially when first arriving in a new country; this has been reportedly previously(20). Having a  
41 male family physician, not being in a patient enrolment model, and not visiting a gynecologist  
42 were associated significantly with late stage at diagnosis. Of concern is that women are at an  
43 increased risk *at all* based on who their physician is. We observed that women with fewer  
44 comorbidities were more likely to have late stage cancer at diagnosis, which is consistent with  
45 the postulate that women with fewer health system contacts are less likely to be caught early. A  
46 large proportion of immigrant women in this cohort also did not speak either of Canada's official  
47 languages which would be a barrier to accessing screening and treatment services.  
48

49 Interestingly, similar overall findings between immigrants and native-born women were  
50 shown by Gomez et al. in a population-based study using the California Cancer Registry  
51 comparing foreign-born and native Hispanic women, on the odds of late stage cervical cancer  
52 (stage II-IV), and controlling for possible ethnicity-related confounding (OR=1.04, 95%  
53 CI=0.94-1.15). In this study, the authors did find that lower socioeconomic status was associated  
54  
55  
56  
57  
58  
59  
60

1  
2  
3 with late stage disease (OR=1.29; 95% CI=1.03-1.63)(8). Montealegre et al. however, examined  
4 this question using data from the Surveillance, Epidemiology, and End Results program, and  
5 found that foreign-born Hispanic women were slightly more likely to have a late stage diagnosis  
6 than US-born women (OR=1.09; 95% CI= 1.05-1.15), although the outcome was defined  
7 differently using summary staging than was done in the present study (9). Although costs of  
8 screening for cervical cancer may be relatively low, in the United States, accessing healthcare  
9 services typically requires proof of insurance coverage, which may deter immigrants from being  
10 screened routinely and from seeking care when symptoms emerge. In Canada, routine screening  
11 is covered under a government-funded health insurance system, though comparable barriers to  
12 access may exist for newcomers who have yet to be registered and for whom indirect costs (e.g.  
13 transportation) may still be an issue.

14  
15  
16 This study is the first we know of to examine the association between immigrant status  
17 and stage of diagnosis in a general population. Previous studies focused on particular ethnic  
18 groups (e.g. Hispanics), but with the use of population-level data, we are reporting findings  
19 based on the entire population of the province of Ontario. Given Ontario's diverse population,  
20 our study is unique in having data on a broad ethnic mix of immigrants, enabling observation of  
21 patterns by region of origin. We also make use of collaborative staging, a relatively new method  
22 of capturing stage that makes use of multiple sources to allow for more complete stage data(21).  
23 However, our study has several limitations. First, despite being population-based, our study is  
24 limited by small sample size, which could partly be influenced by the increasing use of  
25 preventive practices reducing the number of incident cases of cervical cancer in Ontario.  
26 Furthermore, our data set was not sufficiently large to allow for meaningful comparison of more  
27 recent and less recent immigrants. Second, the transition to new staging methods resulted in a  
28 sizeable proportion (36%) of unavailable stage data in the 2010-2014 cohort though the  
29 comparable proportion of missing data between immigrants and long-term residents makes it  
30 unlikely to be an issue of differential reporting between groups. We confirmed our results with  
31 data from 2007-2012, for which the proportion of missing data was less (14%). Third, the CIC  
32 database may not capture all immigrants, whereby control patients whose birthdate differed from  
33 their date of OHIP eligibility could be misclassified as controls instead of cases. Lastly, not all  
34 relevant variables are captured in administrative data, including those such as educational  
35 achievement and religion, and variables such as country of origin may not accurately reflect  
36 sociocultural influences on disease risk factors at an individual level. Though our results are  
37 representative of the population of Ontario, they may not be generalizable to other regions with  
38 different population demographics.

39  
40  
41 In conclusion, we observed no difference in stage at diagnosis between immigrants and  
42 long-term residents with cervical cancer in Ontario, Canada. Placed in the context of previous  
43 research showing that immigrant women were screened less for cervical cancer than long-term  
44 residents, our results pose an interesting and unexpected finding indicating that previously broad  
45 notions regarding immigrant health may require a refined approach that factors in differing  
46 innate health risks per ethnic group as well as health habits. In our cohort, nearly all immigrants  
47 lived in a major urban center, and comorbidities, screening status (especially being never  
48 screened), and physician characteristics were associated risk factors for late stage disease.  
49 Addressing those at risk by targeting potentially higher-risk ethnic groups, such as South Asians,  
50 those who have never been screened, and better understanding the reasons for the findings based  
51 on physician characteristics may facilitate the improvement of modifiable health outcomes.  
52  
53  
54  
55  
56  
57  
58  
59  
60

1  
2  
3  
4  
5  
6  
7  
8  
9  
10  
11  
12  
13  
14  
15  
16  
17  
18  
19  
20  
21  
22  
23  
24  
25  
26  
27  
28  
29  
30  
31  
32  
33  
34  
35  
36  
37  
38  
39  
40  
41  
42  
43  
44  
45  
46  
47  
48  
49  
50  
51  
52  
53  
54  
55  
56  
57  
58  
59  
60

Future work into the characteristics of those patients who are never screened will better elucidate how programs may be directed to address an otherwise preventable disease.

Confidential



Table 1: Characteristics of women in the study cohort diagnosed with cervical cancer in Ontario in 2010-2014. Cases (immigrant women) were matched 1:4 with controls (long-term residents).

| Characteristic, n (%)                                 | Immigrants (n=345) | Long-Term Residents (n=1380) |
|-------------------------------------------------------|--------------------|------------------------------|
| Age (median)                                          | 50                 | 53                           |
| Neighbourhood income quintile                         |                    |                              |
| 1 (low)                                               | 96 (27.8)          | 304 (22.0)                   |
| 2                                                     | 93 (27.0)          | 271 (19.6)                   |
| 3                                                     | 47 (13.6)          | 278 (20.1)                   |
| 4                                                     | 64 (18.6)          | 271 (19.6)                   |
| 5 (high)                                              | 44 (12.8)          | 247 (17.9)                   |
| Missing data                                          | <5 (n/a)           | <5 (n/a)                     |
| Rurality index                                        |                    |                              |
| Major urban                                           | 332 (96.0)         | 937 (67.9)                   |
| Non-major urban                                       | <5 (n/a)           | 324 (23.5)                   |
| Rural                                                 | <5 (n/a)           | 108 (7.8)                    |
| Missing data                                          | <5 (n/a)           | 8 (0.6)                      |
| Aggregated diagnosis group                            |                    |                              |
| 0 (no comorbidity)                                    | 23 (6.7)           | 108 (7.8)                    |
| 1-5                                                   | 163 (47.2)         | 655 (47.4)                   |
| 6-9                                                   | 105 (30.4)         | 445 (32.2)                   |
| 10+ (high comorbidity)                                | 54 (15.7)          | 172 (12.5)                   |
| Screening status                                      |                    |                              |
| Within past 3 years                                   | 126 (36.5)         | 465 (33.7)                   |
| 3-5 years                                             | 32 (9.3)           | 162 (11.7)                   |
| >5 years ago                                          | 11 (3.2)           | 38 (2.8)                     |
| Never screened                                        | 174 (50.4)         | 715 (51.8)                   |
| Had a visit to gynecologist in the past three years   |                    |                              |
| Yes                                                   | 204 (59.1)         | 788 (57.1)                   |
| No                                                    | 141 (40.9)         | 592 (42.9)                   |
| Missing data                                          | -                  | -                            |
| Median # of health contacts in past three years       | 23.5               | 21                           |
| Diagnosis of HIV                                      | <5 (n/a)           | <5 (n/a)                     |
| Family physician sex                                  |                    |                              |
| Female                                                | 118 (34.2)         | 507 (36.7)                   |
| Male                                                  | 222 (64.3)         | 798 (57.8)                   |
| Missing data                                          | 6 (1.7)            | 64 (4.6)                     |
| Family physician is an International Medical Graduate |                    |                              |
| Yes                                                   | 154 (44.6)         | 250 (18.1)                   |
| No                                                    | 186 (53.9)         | 1066 (77.2)                  |
| Missing data                                          | 6 (1.7)            | 64 (4.6)                     |
| Family physician in a patient enrolment model         |                    |                              |
| Yes                                                   | 296 (85.8)         | 1207 (87.5)                  |
| No                                                    | 45 (13.0)          | 112 (8.1)                    |
| Missing data                                          | <5 (n/a)           | 61 (4.4)                     |

Table 2a: Characteristics of 345 immigrant women with diagnosis of cervical cancer in Ontario

| Characteristic, n (%)     | Immigrants (n=345) |
|---------------------------|--------------------|
| Immigrant class           |                    |
| Economic                  | 134 (38.8)         |
| Family                    | 162 (46.96)        |
| Refugee with landing visa | 48 (13.9)          |
| Other                     | <5 (n/a)           |
| Language ability          |                    |
| English or French         | 195 (56.5)         |
| Other                     | 150 (43.5)         |
| Region of origin          |                    |
| Africa                    | 8 (2.3)            |
| Caribbean                 | 26 (7.5)           |
| East Asia                 | 118 (34.2)         |
| Hispanic America          | 29 (8.4)           |
| Middle East               | 20 (5.8)           |
| South Asia                | 48 (13.9)          |
| Western Europe and USA    | 94 (27.2)          |

Table 2b: Immigrant characteristics by stage

| Characteristic, n (%)     | Immigrants (n=345) |             |            |
|---------------------------|--------------------|-------------|------------|
|                           | No known stage     | Early Stage | Late Stage |
| Immigrant class           |                    |             |            |
| Economic                  | 43 (33.9)          | 55 (46.6)   | 36 (36.0)  |
| Family                    | 64 (50.4)          | 43 (38.1)   | 53 (53.0)  |
| Refugee with landing visa | 19 (15.0)          | 18 (15.3)   | 11 (11.0)  |
| Other                     | <5 (n/a)           | -           | -          |
| Language ability          |                    |             |            |
| English/French            | 75 (59.1)          | 71 (60.2)   | 49 (49.0)  |
| Other                     | 52 (40.9)          | 47 (39.8)   | 51 (51.0)  |
| Region of origin          |                    |             |            |
| Africa                    | <5 (n/a)           | 6 (5.1)     | <5 (n/a)   |
| Caribbean                 | 11 (8.7)           | 9 (7.6)     | 6 (6.0)    |
| East Asia                 | 40 (31.5)          | 46 (39.0)   | 31 (31.0)  |
| Hispanic America          | 10 (7.9)           | 11 (9.3)    | 8 (8.0)    |
| Middle East               | 12 (9.4)           | <5 (n/a)    | <5 (n/a)   |
| South Asia                | 22 (17.3)          | <5 (n/a)    | 22 (22.0)  |
| Western Europe and USA    | 30 (23.6)          | 36 (30.5)   | 28 (28.0)  |

Table 3: Participant demographics by stage

| Characteristic, n (%)                                    | Immigrants (n=345) |             |            | Long-Term Residents (n=1380) |             |            |
|----------------------------------------------------------|--------------------|-------------|------------|------------------------------|-------------|------------|
|                                                          | No known stage     | Early Stage | Late Stage | No known stage               | Early Stage | Late Stage |
| Immigrant status                                         | 127 (36.8)         | 118 (34.2)  | 100 (29.0) | 506 (36.7)                   | 463 (35.6)  | 411 (29.8) |
| Income quintile                                          |                    |             |            |                              |             |            |
| 1 (low)                                                  | 31 (24.4)          | 37 (31.4)   | 28 (28.0)  | 114 (22.5)                   | 101 (21.8)  | 89 (21.7)  |
| 2                                                        | 42 (33.1)          | 24 (20.3)   | 27 (27.0)  | 98 (19.4)                    | 86 (18.6)   | 87 (21.2)  |
| 3                                                        | 19 (15.0)          | 15 (12.7)   | 13 (13.0)  | 97 (19.2)                    | 104 (22.5)  | 77 (18.7)  |
| 4                                                        | 24 (18.9)          | 21 (17.8)   | 19 (19.0)  | 99 (19.6)                    | 92 (19.9)   | 80 (19.5)  |
| 5 (high)                                                 | 10 (7.9)           | 21 (17.8)   | 13 (13.0)  | 95 (18.8)                    | 76 (16.4)   | 76 (18.5)  |
| Missing data                                             | <5 (n/a)           | -           | -          | <5 (n/a)                     | <5 (n/a)    | <5 (n/a)   |
| Rurality index                                           |                    |             |            |                              |             |            |
| Rural                                                    | <5 (n/a)           | <5 (n/a)    | -          | 38 (7.5)                     | 35 (7.6)    | 35 (8.5)   |
| Non-major urban                                          | <5 (n/a)           | <5 (n/a)    | <5 (n/a)   | 99 (19.6)                    | 118 (25.5)  | 107 (26.0) |
| Major urban                                              | 121 (95.3)         | 113 (95.8)  | 98 (98.0)  | 366 (72.3)                   | 308 (66.5)  | 263 (64.0) |
| Missing data                                             | <5 (n/a)           | -           | -          | <5 (n/a)                     | <5 (n/a)    | 6 (1.5)    |
| Aggregated diagnosis group                               |                    |             |            |                              |             |            |
| 0 (no comorbidity)                                       | 9 (7.1)            | 6 (5.1)     | 8 (8.0)    | 39 (7.7)                     | 20 (4.3)    | 49 (11.9)  |
| 1-5                                                      | 53 (41.7)          | 65 (55.1)   | 45 (45.0)  | 218 (43.1)                   | 223 (48.2)  | 214 (52.1) |
| 6-9                                                      | 43 (33.9)          | 27 (22.9)   | 35 (35.0)  | 181 (35.8)                   | 165 (35.6)  | 99 (24.1)  |
| 10+ (high comorbidity)                                   | 22 (17.3)          | 20 (16.9)   | 12 (12.0)  | 68 (13.4)                    | 55 (11.9)   | 49 (11.9)  |
| Screening status                                         |                    |             |            |                              |             |            |
| Within past 3 years                                      | 51 (40.2)          | 52 (44.1)   | 23 (23.0)  | 181 (35.8)                   | 197 (42.5)  | 87 (21.2)  |
| 3-5 years                                                | 15 (11.8)          | 11 (9.3)    | 6 (6.0)    | 69 (13.6)                    | 57 (12.3)   | 36 (8.8)   |
| >5 years ago                                             | <5 (n/a)           | <5 (n/a)    | 6 (6.0)    | 27 (5.3)                     | <5 (n/a)    | 6 (1.5)    |
| Never screened                                           | 57 (44.9)          | 52 (44.1)   | 65 (65.0)  | 229 (45.3)                   | 204 (44.1)  | 282 (68.6) |
| Had a visit to gynecologist in the past three years      |                    |             |            |                              |             |            |
| No                                                       | 56 (44.0)          | 38 (68.0)   | 47 (47.0)  | 226 (45.0)                   | 132 (29.0)  | 234 (57.0) |
| Yes                                                      | 71 (55.9)          | 80 (67.8)   | 53 (53.0)  | 280 (55.3)                   | 331 (71.5)  | 177 (43.1) |
| Family physician sex                                     |                    |             |            |                              |             |            |
| Female                                                   | 48 (37.8)          | 41 (34.7)   | 29 (29.0)  | 207 (40.9)                   | 188 (40.6)  | 123 (29.9) |
| Male                                                     | 77 (60.6)          | 77 (65.3)   | 68 (68.0)  | 281 (55.5)                   | 262 (56.6)  | 255 (62.0) |
| Missing data                                             | <5 (n/a)           | -           | <5 (n/a)   | 18 (3.6)                     | 13 (2.8)    | 33 (8.0)   |
| Family physician in a patient enrolment model            |                    |             |            |                              |             |            |
| No                                                       | 11 (8.7)           | 18 (15.3)   | 16 (16)    | 48 (9.5)                     | 24 (5.2)    | 40 (9.7)   |
| Yes                                                      | 114 (89.8)         | 100 (84.7)  | 82 (82)    | 441 (87.2)                   | 426 (92.0)  | 340 (82.7) |
| Missing data                                             | <5 (n/a)           | -           | <5 (n/a)   | 17 (3.4)                     | 13 (2.8)    | 31 (7.5)   |
| Median number of healthcare contacts in past three years | 30                 | 23.5        | 23         | 23.5                         | 18          | 21         |

Table 4: Bivariate and multivariate analysis showing unadjusted and adjusted odds ratios with respect to the probability of late stage vs. early stage for the study cohort

| Characteristic                                    | Unadjusted Odds Ratio (95% CI) | P-value | Adjusted Odds Ratio (95% CI) | P-value |
|---------------------------------------------------|--------------------------------|---------|------------------------------|---------|
| Immigrant status                                  |                                |         |                              |         |
| Long-Term Resident                                | 0.99 (0.70-1.4)                | 0.9529  | 0.94 (0.63-1.4)              | 0.7390  |
| Immigrant                                         | 1.00                           |         | 1.00                         |         |
| Income quintile                                   |                                |         |                              |         |
| 1                                                 | 0.85 (0.54-1.4)                | 0.8506  | 0.87 (0.53-1.43)             | 0.5608  |
| 2                                                 | 1.02 (0.62-1.7)                |         | 0.99 (0.58-1.70)             |         |
| 3                                                 | 0.86 (0.53-1.4)                |         | 0.92 (0.54-1.58)             |         |
| 4                                                 | 1.05 (0.64-1.7)                |         | 1.33 (0.78-2.27)             |         |
| 5                                                 | 1.00                           |         | 1.00                         |         |
| Rurality index                                    |                                |         |                              |         |
| Rural                                             | 0.98 (0.53-1.8)                | 0.9684  | 0.94 (0.45-1.9)              | 0.7509  |
| Non-major urban                                   | 0.95 (0.67-1.4)                |         | 0.85 (0.55-1.3)              |         |
| Major urban                                       | 1.00                           |         | 1.00                         |         |
| Aggregated diagnosis group                        |                                |         |                              |         |
| 0 (no comorbidity)                                | 3.29 (1.51-7.15)               | 0.0006  | 1.66 (0.60-4.59)             | 0.1798  |
| 1-5                                               | 1.50 (0.93-2.43)               |         | 1.18 (0.61-2.27)             |         |
| 6-9                                               | 0.88 (0.52-1.48)               |         | 0.78 (0.42-1.45)             |         |
| 10+ (high comorbidity)                            | 1.00                           |         | 1.00                         |         |
| Screening status*                                 |                                |         |                              |         |
| Within past 3 years                               | 0.41 (0.29-0.59)               | <0.0001 | ---                          | ---     |
| 3-5 years                                         | 0.48 (0.28-0.81)               |         |                              |         |
| >5 years ago                                      | 1.88 (0.54-6.54)               |         |                              |         |
| Never screened                                    | 1.00                           |         |                              |         |
| Visit to gynecologist in the past three years     |                                |         |                              |         |
| No                                                | 2.73 (2.00-3.73)               | <0.0001 | 2.47 (1.8-3.5)               | <0.0001 |
| Yes                                               | 1.00                           |         | 1.00                         |         |
| Family physician sex                              |                                |         |                              |         |
| Female                                            | 0.69 (0.50-0.95)               | 0.0230  | 0.71 (0.50-1.0)              | 0.0560  |
| Male                                              | 1.00                           |         | 1.00                         |         |
| Family physician in a patient enrolment model     |                                |         |                              |         |
| No                                                | 1.65 (0.99-2.8)                | 0.0573  | 1.72 (0.98-3.0)              | 0.0586  |
| Yes                                               | 1.00                           |         | 1.00                         |         |
| Number of healthcare contacts in past three years | 0.992 (0.986-0.998)            | 0.0128  | 0.999 (0.991-1.01)           | 0.8583  |

\* Screening was excluded from multivariate analysis as lack of screening could be on the causal pathway

\*\*HIV diagnosis was excluded because of small cell sizes

**Figure 1-** Study cohort selection flow diagram of immigrant women and long-term residents with diagnosis of cervical cancers

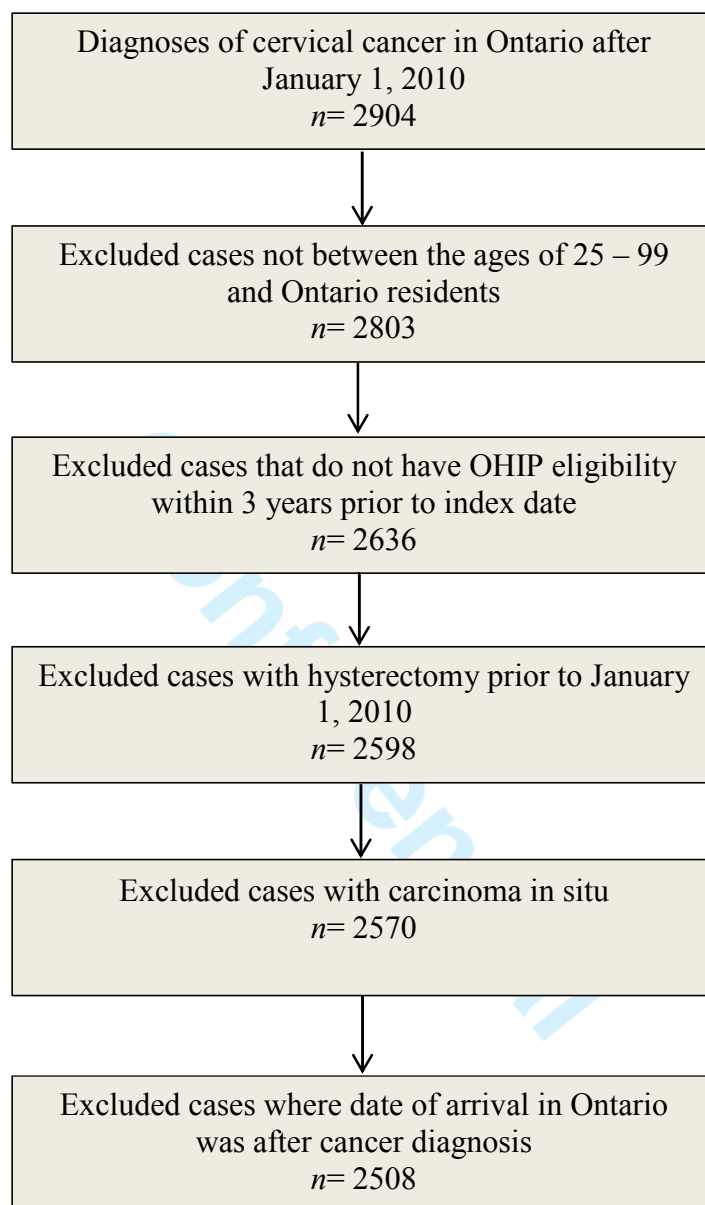

## ACKNOWLEDGMENTS

R. T. Voruganti is supported by a grant from the Canadian Institutes for Health Research MD/PhD student research fund and McLaughlin Foundation fellowship. E. Grunfeld is supported by a clinician-scientist award from the Ontario Institute for Cancer Research (OICR). A. Lofters is supported by a Career Development Award in Cancer Prevention from the Canadian Cancer Society Research Institute and as a Clinician Scientist at the Department of Family and Community Medicine at the University of Toronto. Data were provided by Citizenship and Immigration Canada, the Ontario Cancer Registry and the Institute for Clinical Evaluation Sciences (ICES). ICES is supported by a grant from the Ontario Ministry of Health and Long Term Care (MOHLTC). The opinions and conclusions expressed here are those of the authors and not of the supporting organizations (ICES, OICR, MOHLTC).

## CONTRIBUTIONS

R. T. V. conceived of the study, contributed to the design of the study and analysis, and wrote the first draft of the article. R. M. contributed to the design and analysis of the study and provided feedback on the manuscript. N. J. performed the analysis of the study and provided feedback on the manuscript. L. E. helped conceive the study, contributed to writing the manuscript and provided feedback. E. G. helped conceive the study, contributed to writing the manuscript and provided feedback. A. K. L. helped conceive the study, contributed to the design and analysis of the study, and provided feedback on the manuscript. All authors gave final approval of the version to be published and are willing to act as guarantors of this work.

## REFERENCES

1. Ferlay J, Soerjomataram I, Dikshit R, Eser S, Mathers C, Rebelo M, et al. Cancer incidence and mortality worldwide: sources, methods and major patterns in GLOBOCAN 2012. *Int J Cancer*.2015;136(5):E359-86.
2. Fitzmaurice C, Dicker D, Pain A, Hamavid H, Moradi-Lakeh M, MacIntyre MF, et al. The Global Burden of Cancer 2013. *JAMA Oncol*.2015 Jul;1(4):505-27.
3. Murphy J, Kennedy EB, Dunn S, McLachlin CM, Fung Kee Fung M, Gzik D, et al. Cervical screening: a guideline for clinical practice in Ontario. *J Obstet Gynaecol Can*.2012 May;34(5):453-8.
4. Statistics CACoC. Canadian Cancer Statistics 2015. Toronto, ON: Canadian Cancer Society; 2015.
5. Lofters AK, Moineddin R, Hwang SW, Glazier RH. Predictors of low cervical cancer screening among immigrant women in Ontario, Canada. *BMC Womens Health*.2011;11:20.
6. De Alba I, Hubbell FA, McMullin JM, Sweningson JM, Saitz R. Impact of U.S. citizenship status on cancer screening among immigrant women. *J Gen Intern Med*.2005 Mar;20(3):290-6.
7. Saghari S, Ghamsary M, Marie-Mitchell A, Oda K, Morgan JW. Sociodemographic predictors of delayed- versus early-stage cervical cancer in California. *Ann Epidemiol*.2015;25(4):250-5.
8. Gomez N, Guendelman S, Harley KG, Gomez SL. Nativity and neighborhood characteristics and cervical cancer stage at diagnosis and survival outcomes among Hispanic women in California. *American journal of public health*.2015 Mar;105(3):538-45.
9. Montealegre JR, Zhou R, Amirian ES, Follen M, Scheurer ME. Nativity disparities in late-stage diagnosis and cause-specific survival among Hispanic women with invasive cervical

- 1  
2  
3 cancer: an analysis of Surveillance, Epidemiology, and End Results data. *Cancer causes &*  
4 *control* : CCC.2013 Nov;24(11):1985-94.
- 5  
6 10. Population by year, by province and territory. In: Canada S, editor. Ottawa2015.
- 7 11. Canada S. 2011 National Household Survey. In: 2011 C, editor. Ottawa: Statistics  
8 Canada; 2011.
- 9 12. Marrett LD, Clarke EA, Hatcher J, Weir HK. Epidemiologic research using the Ontario  
10 Cancer Registry. *Canadian journal of public health = Revue canadienne de sante publique*.1986  
11 May-Jun;77 Suppl 1:79-85.
- 12 13. Immigration and Refugee Protection Act (S.C. 2001, c. 27). Available from:  
13 <http://laws.justice.gc.ca/eng/acts/I-2.5/>.
- 14 14. Canada S. 2006 Census2006.
- 15 15. Lofters AK, Moineddin R, Hwang SW, Glazier RH. Low rates of cervical cancer  
16 screening among urban immigrants: a population-based study in Ontario, Canada. *Med*  
17 *Care*.2010 Jul;48(7):611-8.
- 18 16. Crawford J, Ahmad F, Beaton D, Bierman AS. Cancer screening behaviours among  
19 South Asian immigrants in the UK, US and Canada: a scoping study. *Health Soc Care*  
20 *Community*.2016 Mar;24(2):123-53.
- 21 17. Gupta A, Kumar A, Stewart DE. Cervical cancer screening among South Asian women in  
22 Canada: the role of education and acculturation. *Health Care Women Int*.2002 Feb;23(2):123-34.
- 23 18. Redwood-Campbell L, Fowler N, Laryea S, Howard M, Kaczorowski J. 'Before you  
24 teach me, I cannot know': immigrant women's barriers and enablers with regard to cervical  
25 cancer screening among different ethnolinguistic groups in Canada. *Canadian journal of public*  
26 *health = Revue canadienne de sante publique*.2011;102(3):230-4.
- 27 19. McDonald JT, Kennedy S. Insights into the 'healthy immigrant effect': health status and  
28 health service use of immigrants to Canada. *Social science & medicine*.2004 Oct;59(8):1613-27.
- 29 20. Lofters AK, Ng R, Lobb R. Primary care physician characteristics associated with cancer  
30 screening: a retrospective cohort study in Ontario, Canada. *Cancer Med*.2015 Feb;4(2):212-23.
- 31 21. Cancer CPA. Cancer Stage in Performance Measurement: A First Look - A System  
32 Performance Spotlight Report. Toronto: The Partnership2015.
- 33  
34  
35  
36  
37  
38  
39  
40  
41  
42  
43  
44  
45  
46  
47  
48  
49  
50  
51  
52  
53  
54  
55  
56  
57  
58  
59  
60

STROBE Statement—Checklist of items that should be included in reports of *cohort studies*

|                              | Item No | Recommendation                                                                                                                                                                                                                                                                                                                                                                                                                                                                                                            |
|------------------------------|---------|---------------------------------------------------------------------------------------------------------------------------------------------------------------------------------------------------------------------------------------------------------------------------------------------------------------------------------------------------------------------------------------------------------------------------------------------------------------------------------------------------------------------------|
| <b>Title and abstract</b>    | 1       | (a) Indicate the study's design with a commonly used term in the title or the abstract:<br><input checked="" type="checkbox"/>                                                                                                                                                                                                                                                                                                                                                                                            |
|                              |         | (b) Provide in the abstract an informative and balanced summary of what was done and what was found<br><input checked="" type="checkbox"/>                                                                                                                                                                                                                                                                                                                                                                                |
| <b>Introduction</b>          |         |                                                                                                                                                                                                                                                                                                                                                                                                                                                                                                                           |
| Background/rationale         | 2       | Explain the scientific background and rationale for the investigation being reported<br><input checked="" type="checkbox"/>                                                                                                                                                                                                                                                                                                                                                                                               |
| Objectives                   | 3       | State specific objectives, including any prespecified hypotheses<br><input checked="" type="checkbox"/>                                                                                                                                                                                                                                                                                                                                                                                                                   |
| <b>Methods</b>               |         |                                                                                                                                                                                                                                                                                                                                                                                                                                                                                                                           |
| Study design                 | 4       | Present key elements of study design early in the paper<br><input checked="" type="checkbox"/>                                                                                                                                                                                                                                                                                                                                                                                                                            |
| Setting                      | 5       | Describe the setting, locations, and relevant dates, including periods of recruitment, exposure, follow-up, and data collection<br><input checked="" type="checkbox"/>                                                                                                                                                                                                                                                                                                                                                    |
| Participants                 | 6       | (a) Give the eligibility criteria, and the sources and methods of selection of participants. Describe methods of follow-up<br><input checked="" type="checkbox"/><br>(b) For matched studies, give matching criteria and number of exposed and unexposed<br><input checked="" type="checkbox"/>                                                                                                                                                                                                                           |
| Variables                    | 7       | Clearly define all outcomes, exposures, predictors, potential confounders, and effect modifiers. Give diagnostic criteria, if applicable<br><input checked="" type="checkbox"/>                                                                                                                                                                                                                                                                                                                                           |
| Data sources/<br>measurement | 8*      | For each variable of interest, give sources of data and details of methods of assessment (measurement). Describe comparability of assessment methods if there is more than one group<br><input checked="" type="checkbox"/>                                                                                                                                                                                                                                                                                               |
| Bias                         | 9       | Describe any efforts to address potential sources of bias<br><input checked="" type="checkbox"/>                                                                                                                                                                                                                                                                                                                                                                                                                          |
| Study size                   | 10      | Explain how the study size was arrived at<br><input checked="" type="checkbox"/>                                                                                                                                                                                                                                                                                                                                                                                                                                          |
| Quantitative variables       | 11      | Explain how quantitative variables were handled in the analyses. If applicable, describe which groupings were chosen and why<br><input checked="" type="checkbox"/>                                                                                                                                                                                                                                                                                                                                                       |
| Statistical methods          | 12      | (a) Describe all statistical methods, including those used to control for confounding<br><input checked="" type="checkbox"/><br>(b) Describe any methods used to examine subgroups and interactions<br><input checked="" type="checkbox"/><br>(c) Explain how missing data were addressed<br><input checked="" type="checkbox"/><br>(d) If applicable, explain how loss to follow-up was addressed<br><input checked="" type="checkbox"/><br>(e) Describe any sensitivity analyses<br><input checked="" type="checkbox"/> |



| <b>Results</b>           |     |                                                                                                                                                                                                                                                     |
|--------------------------|-----|-----------------------------------------------------------------------------------------------------------------------------------------------------------------------------------------------------------------------------------------------------|
| Participants             | 13* | (a) Report numbers of individuals at each stage of study—eg numbers potentially eligible, examined for eligibility, confirmed eligible, included in the study, completing follow-up, and analysed<br><input checked="" type="checkbox"/>            |
|                          |     | (b) Give reasons for non-participation at each stage<br><input checked="" type="checkbox"/>                                                                                                                                                         |
|                          |     | (c) Consider use of a flow diagram<br><input checked="" type="checkbox"/>                                                                                                                                                                           |
| Descriptive data         | 14* | (a) Give characteristics of study participants (eg demographic, clinical, social) and information on exposures and potential confounders<br><input checked="" type="checkbox"/>                                                                     |
|                          |     | (b) Indicate number of participants with missing data for each variable of interest<br><input checked="" type="checkbox"/>                                                                                                                          |
|                          |     | (c) Summarise follow-up time (eg, average and total amount)<br><input checked="" type="checkbox"/>                                                                                                                                                  |
| Outcome data             | 15* | Report numbers of outcome events or summary measures over time<br><input checked="" type="checkbox"/>                                                                                                                                               |
| Main results             | 16  | (a) Give unadjusted estimates and, if applicable, confounder-adjusted estimates and their precision (eg, 95% confidence interval). Make clear which confounders were adjusted for and why they were included<br><input checked="" type="checkbox"/> |
|                          |     | (b) Report category boundaries when continuous variables were categorized<br><input checked="" type="checkbox"/>                                                                                                                                    |
|                          |     | (c) If relevant, consider translating estimates of relative risk into absolute risk for a meaningful time period<br><input checked="" type="checkbox"/>                                                                                             |
| Other analyses           | 17  | Report other analyses done—eg analyses of subgroups and interactions, and sensitivity analyses<br><input checked="" type="checkbox"/>                                                                                                               |
| <b>Discussion</b>        |     |                                                                                                                                                                                                                                                     |
| Key results              | 18  | Summarise key results with reference to study objectives<br><input checked="" type="checkbox"/>                                                                                                                                                     |
| Limitations              | 19  | Discuss limitations of the study, taking into account sources of potential bias or imprecision. Discuss both direction and magnitude of any potential bias<br><input checked="" type="checkbox"/>                                                   |
| Interpretation           | 20  | Give a cautious overall interpretation of results considering objectives, limitations, multiplicity of analyses, results from similar studies, and other relevant evidence<br><input checked="" type="checkbox"/>                                   |
| Generalisability         | 21  | Discuss the generalisability (external validity) of the study results<br><input checked="" type="checkbox"/>                                                                                                                                        |
| <b>Other information</b> |     |                                                                                                                                                                                                                                                     |
| Funding                  | 22  | Give the source of funding and the role of the funders for the present study and, if applicable, for the original study on which the present article is based<br><input checked="" type="checkbox"/>                                                |

\*Give information separately for exposed and unexposed groups.

1  
2  
3  
4  
5  
6  
7  
8  
9  
10  
11  
12  
13  
14  
15  
16  
17  
18  
19  
20  
21  
22  
23  
24  
25  
26  
27  
28  
29  
30  
31  
32  
33  
34  
35  
36  
37  
38  
39  
40  
41  
42  
43  
44  
45  
46  
47  
48  
49  
50  
51  
52  
53  
54  
55  
56  
57  
58  
59  
60

**Note:** An Explanation and Elaboration article discusses each checklist item and gives methodological background and published examples of transparent reporting. The STROBE checklist is best used in conjunction with this article (freely available on the Web sites of PLoS Medicine at <http://www.plosmedicine.org/>, Annals of Internal Medicine at <http://www.annals.org/>, and Epidemiology at <http://www.epidem.com/>). Information on the STROBE Initiative is available at <http://www.strobe-statement.org>.

Confidential
